# Supplementary material for: Insights into the Hormone-Regulating Mechanism of Adventitious Root Formation in Softwood Cuttings of Cyclocarya paliurus and Optimization of the Hormone-Based Formula for Promoting Rooting
Source: MDPI journal article supplement (doi:10.3390/ijms25021343), 2024-01-22
Supplement: s1 [file s1]

## Supplementary Materials

### Supplementary Tables:

**Table S1. Data quality control of each sample**

| Sample | RawData(bp) | CleanData(bp) | AF_Q20(%)           | AF_Q30(%)           |
|--------|-------------|---------------|---------------------|---------------------|
| U1-1   | 9490722600  | 9418260696    | 9197835879 (97.66%) | 8796407176 (93.40%) |
| U1-2   | 7557417900  | 7495097298    | 7335059648 (97.86%) | 7038460496 (93.91%) |
| U1-3   | 8235694500  | 8175443475    | 7997345896 (97.82%) | 7670651078 (93.83%) |
| U2-1   | 6369126600  | 6314814509    | 6169616813 (97.70%) | 5907214227 (93.55%) |
| U2-2   | 6376837500  | 6308766172    | 6163290061 (97.69%) | 5902739296 (93.56%) |
| U2-3   | 7755867600  | 7676697245    | 7503392629 (97.74%) | 7189874345 (93.66%) |
| U3-1   | 7072183800  | 7014121261    | 6853234916 (97.71%) | 6561645323 (93.55%) |
| U3-2   | 6400034700  | 6340363197    | 6205864456 (97.88%) | 5958509348 (93.98%) |
| U3-3   | 5993775900  | 5941506824    | 5807306117 (97.74%) | 5564318136 (93.65%) |
| U4-1   | 6920610900  | 6854434459    | 6703931457 (97.80%) | 6430253779 (93.81%) |
| U4-2   | 7794695400  | 7713384952    | 7528826847 (97.61%) | 7198727547 (93.33%) |
| U4-3   | 7549488600  | 7473771094    | 7290677261 (97.55%) | 6963362886 (93.17%) |
| D1-1   | 7670463600  | 7610098370    | 7434553718 (97.69%) | 7114209567 (93.48%) |
| D1-2   | 5866717500  | 5822746868    | 5684758740 (97.63%) | 5434398995 (93.33%) |
| D1-3   | 6450338700  | 6400478841    | 6254625660 (97.72%) | 5983949434 (93.49%) |
| D2-1   | 5544637200  | 5495810405    | 5370926819 (97.73%) | 5143465060 (93.59%) |
| D2-2   | 6445602600  | 6394662952    | 6237115813 (97.54%) | 5957633440 (93.17%) |
| D2-3   | 6768116700  | 6711472620    | 6551332713 (97.61%) | 6261938095 (93.30%) |
| D3-1   | 6586533000  | 6542253067    | 6397743406 (97.79%) | 6131448013 (93.72%) |
| D3-2   | 6627561000  | 6580012022    | 6431709914 (97.75%) | 6161301103 (93.64%) |
| D3-3   | 5664131400  | 5624376803    | 5487539031 (97.57%) | 5243303379 (93.22%) |
| D4-1   | 6147993900  | 6096540677    | 5949499232 (97.59%) | 5689610392 (93.33%) |
| D4-2   | 7663922700  | 7605702496    | 7426294152 (97.64%) | 7106420480 (93.44%) |
| D4-3   | 6219270000  | 6163713409    | 6017681710 (97.63%) | 5756940268 (93.40%) |

**Table S2. Mapping rate of each sample**

| Sample | Total reads | Unmapped(%)      | Total_Mapped(%)   |
|--------|-------------|------------------|-------------------|
| U1-1   | 62994504    | 4668823 (7.41%)  | 58325681 (92.59%) |
| U1-2   | 50194716    | 3600793 (7.17%)  | 46593923 (92.83%) |
| U1-3   | 54698204    | 4008810 (7.33%)  | 50689394 (92.67%) |
| U2-1   | 42257630    | 5012746 (11.86%) | 37244884 (88.14%) |
| U2-2   | 42248994    | 5047782 (11.95%) | 37201212 (88.05%) |
| U2-3   | 51457108    | 6140500 (11.93%) | 45316608 (88.07%) |
| U3-1   | 46921356    | 3917887 (8.35%)  | 43003469 (91.65%) |
| U3-2   | 42460646    | 3519019 (8.29%)  | 38941627 (91.71%) |
| U3-3   | 39782988    | 3335641 (8.38%)  | 36447347 (91.62%) |
| U4-1   | 45946242    | 3958144 (8.61%)  | 41988098 (91.39%) |
| U4-2   | 51721426    | 4719352 (9.12%)  | 47002074 (90.88%) |
| U4-3   | 50085242    | 4466399 (8.92%)  | 45618843 (91.08%) |
| D1-1   | 50930700    | 3837443 (7.53%)  | 47093257 (92.47%) |
| D1-2   | 38984134    | 2920225 (7.49%)  | 36063909 (92.51%) |
| D1-3   | 42863422    | 3163663 (7.38%)  | 39699759 (92.62%) |
| D2-1   | 36823850    | 4521449 (12.28%) | 32302401 (87.72%) |
| D2-2   | 42790900    | 5338677 (12.48%) | 37452223 (87.52%) |
| D2-3   | 44931074    | 5505363 (12.25%) | 39425711 (87.75%) |
| D3-1   | 43760866    | 5239789 (11.97%) | 38521077 (88.03%) |
| D3-2   | 44027482    | 4556967 (10.35%) | 39470515 (89.65%) |
| D3-3   | 37616308    | 3937969 (10.47%) | 33678339 (89.53%) |
| D4-1   | 40820084    | 4333364 (10.62%) | 36486720 (89.38%) |
| D4-2   | 50902698    | 5253024 (10.32%) | 45649674 (89.68%) |
| D4-3   | 41297782    | 4266957 (10.33%) | 37030825 (89.67%) |

**Table S3. Module Trait Relation Result**

| Trait | Module name    | ModuleTraitRelationResults (pvalue) |
|-------|----------------|-------------------------------------|
| IAA   | MM.brown       | -0.916088613577993(1.958149e-04)    |
|       | MM.darkgrey    | -0.876994533634533(8.611645e-04)    |
|       | MM.lightcyan   | -0.856363924979661(1.560062e-03)    |
|       | MM.turquoise   | 0.745846361405391(1.325512e-02)     |
|       | MM.plum2       | -0.712504636744523(2.076147e-02)    |
| IBA   | MM.salmon      | 0.980124801431881(6.665428e-07)     |
|       | MM.cyan        | 0.842842370025318(2.197731e-03)     |
|       | MM.bisque4     | -0.82635472111522(3.207316e-03)     |
|       | MM.lightcyan   | 0.822290881826334(3.499985e-03)     |
|       | MM.brown4      | 0.806643377772691(4.807499e-03)     |
| CK    | MM.brown4      | 0.990115866460472(4.126406e-08)     |
|       | MM.plum1       | 0.832808308585645(2.779292e-03)     |
|       | MM.salmon      | 0.826315043338519(3.210085e-03)     |
|       | MM.lightcyan   | 0.767469395349517(9.556031e-03)     |
|       | MM.bisque4     | -0.753221704850762(1.189744e-02)    |
| GA    | MM.darkmagenta | 0.932439663738384(8.396406e-05)     |
|       | MM.brown       | 0.895334064954696(4.619359e-04)     |
|       | MM.cyan        | 0.877657144959418(8.434598e-04)     |
|       | MM.turquoise   | -0.875009331816558(9.158308e-04)    |
|       | MM.tan         | 0.78829705789873(6.746372e-03)      |
| ABA   | MM.orange      | -0.968810898434766(3.986958e-06)    |
|       | MM.darkorange  | -0.873060352246282(9.719176e-04)    |
|       | MM.darkgrey    | -0.863954482017307(1.267631e-03)    |
|       | MM.ivory       | -0.822580355644675(3.478528e-03)    |
|       | MM.bisque4     | -0.788752239811132(6.692496e-03)    |

**Table S4. Key genes involved in hormone signaling during the adventitious root formation of *C. paliurus* cuttings**

| Hormone        | Gene ID      | Symbol | GS   | IEstage | CFstage | RTstage | Module      |
|----------------|--------------|--------|------|---------|---------|---------|-------------|
| Auxin          | CpaF1st07391 | ARF3   | 0.83 | 1.11    | -0.38   | 0.39    | Darkgrey    |
|                | CpaF1st19787 | ARF9   | 0.84 | 1.28    | -0.01   | -0.13   | Brown       |
|                | CpaF1st47101 | AUX22B | 0.80 | 2.47    | -0.06   | 0.19    | Darkgray    |
|                | CpaF1st36805 | AUX22D | 0.81 | -3.13   | -0.76   | 0.74    | Turquoise   |
|                | CpaF1st20857 | AUX28  | 0.87 | -1.72   | -0.66   | -0.31   | Turquoise   |
|                | CpaF1st32297 | GH3.6  | 0.74 | 1.72    | 0.16    | -0.32   | Turquoise   |
|                | CpaF1st20977 | IAA11  | 0.91 | 2.58    | -0.75   | -0.01   | Lightcyan   |
|                | CpaF1st21228 | IAA27  | 0.84 | -1.06   | 0.03    | 0.41    | Darkgray    |
|                | CpaF1st30768 | IAA29  | 0.80 | -2.51   | -0.70   | 0.84    | Turquoise   |
|                | CpaF1st45853 | LAX2   | 0.74 | -1.54   | -0.59   | 0.65    | Lightcyan   |
|                | CpaF1st13976 | LAX3   | 0.84 | -3.26   | -0.43   | 1.12    | Darkgray    |
|                | CpaF1st03051 | SAUR23 | 0.79 | -2.13   | -0.11   | 0.96    | Turquoise   |
| Cytokinin      | CpaF1st02154 | ARR4   | 0.86 | -1.57   | 1.33    | 0.35    | brown4      |
| Gibberellin    | CpaF1st13656 | GAIPB  | 0.85 | -1.16   | -0.16   | 0.18    | Turquoise   |
|                | CpaF1st32287 | GID1B  | 0.88 | 1.96    | -0.16   | -0.87   | Turquoise   |
|                | CpaF1st35359 | PIF1   | 0.93 | 1.31    | 0.30    | -0.33   | Darkmagenta |
| Absciscic acid | CpaF1st09221 | PYL4   | 0.72 | -0.49   | 0.93    | 1.11    | Orange      |
|                | CpaF1st45800 | PYL4   | 0.75 | 0.59    | 1.13    | 0.59    | Darkorange  |
|                | CpaF1st03325 | SRK2A  | 0.83 | -1.73   | 0.14    | 0.10    | orange      |

**Table S5. Key genes involved in hormonal interactions during the adventitious root formation of *C. paliurus* cuttings**

| Hormone  |        | Gene ID      | Symbol    | Gs   | IEstage | CFstage | RTstage | Module    |
|----------|--------|--------------|-----------|------|---------|---------|---------|-----------|
| Auxin-CK | IAA-CK | CpaF1st07219 | ARR9      | 0.91 | -2.46   | 0.80    | 1.04    | brown     |
|          |        | CpaF1st17472 | ARR9      | 0.95 | -4.36   | 0.86    | 0.86    | Turquoise |
|          |        | CpaF1st20600 | AHK2      | 0.97 | 2.31    | -0.43   | 0.26    | Lightcyan |
|          |        | CpaF1st25702 | ARR9      | 0.94 | -3.83   | 1.12    | 0.19    | Turquoise |
|          |        | CpaF1st27305 | RR23      | 0.94 | 1.88    | -0.08   | 0.06    | Turquoise |
|          |        | CpaF1st33811 | AHP1      | 0.95 | 3.96    | -0.58   | -0.34   | Lightcyan |
|          |        | CpaF1st36927 | IAA11     | 0.92 | 0.29    | -1.08   | 0.44    | Darkgray  |
|          |        | CpaF1st46612 | PHP5      | 0.96 | -5.12   | 2.64    | 0.22    | Turquoise |
|          |        | MSTRG.8529   | ARG7      | 0.82 | -0.37   | -1.39   | 0.14    | Brown     |
|          | IBA-CK | CpaF1st02154 | ARR4      | 0.96 | -1.57   | 1.33    | 0.35    | Salmon    |
|          |        | CpaF1st02159 | ARR4      | 0.96 | -2.19   | 1.38    | 1.04    | Salmon    |
| Auxin-GA | IAA-GA | CpaF1st04532 | IAA8      | 0.95 | -2.56   | 0.82    | 0.86    | Darkgray  |
|          |        | CpaF1st12447 | LAX5      | 0.97 | -1.73   | -1.27   | 1.58    | Turquoise |
|          |        | CpaF1st12660 | SAUR-Like | 0.93 | 3.78    | 0.08    | -0.12   | Turquoise |
|          |        | CpaF1st13976 | LAX3      | 0.93 | -3.26   | -0.43   | 1.12    | Turquoise |
|          |        | CpaF1st16217 | SAUR36    | 0.97 | 2.95    | -0.09   | -0.73   | Brown     |
|          |        | CpaF1st19787 | ARF9      | 0.94 | 1.28    | -0.01   | -0.13   | Turquoise |
|          |        | CpaF1st21098 | GAI1      | 0.97 | 1.25    | -0.40   | 0.16    | Lightcyan |
|          |        | CpaF1st21228 | IAA27     | 0.98 | -1.06   | 0.03    | 0.41    | Brown     |
|          |        | CpaF1st30768 | IAA29     | 0.93 | -2.51   | -0.70   | 0.84    | Turquoise |
|          |        | CpaF1st32297 | GH3.6     | 0.98 | 1.72    | 0.16    | -0.32   | Turquoise |
|          |        | CpaF1st32869 | IAA4      | 0.99 | -2.39   | -0.13   | 1.52    | Brown     |
|          |        | CpaF1st36805 | AUX22D    | 0.91 | -3.13   | -0.76   | 0.74    | Turquoise |

|               |             |              |        |      |       |       |       |           |
|---------------|-------------|--------------|--------|------|-------|-------|-------|-----------|
| Auxin-<br>ABA | IBA-<br>GA  | CpaF1st13656 | GAIPB  | 0.91 | -1.16 | -0.16 | 0.18  | Turquoise |
|               |             | CpaF1st20270 | GH3.6  | 0.92 | 4.10  | -0.29 | -1.13 | Brown     |
|               |             | CpaF1st32287 | GID1B  | 0.83 | 1.96  | -0.16 | -0.87 | Turquoise |
|               | IAA-<br>ABA | CpaF1st00123 | PYL3   | 0.92 | 1.26  | -0.57 | 0.12  | Lightcyan |
|               |             | CpaF1st03325 | SRK2A  | 0.94 | -1.73 | 0.14  | 0.10  | Turquoise |
|               |             | CpaF1st03827 | ABF4   | 0.91 | 1.49  | 0.06  | -0.09 | Turquoise |
|               |             | CpaF1st04476 | IAA14  | 0.81 | -1.02 | -2.34 | 0.08  | Brown     |
|               |             | CpaF1st04797 | SAUR71 | 0.89 | 2.10  | 0.21  | 0.60  | Brown     |
|               |             | CpaF1st07391 | ARF3   | 0.92 | 1.11  | -0.38 | 0.39  | Lightcyan |
|               |             | CpaF1st11455 | SAUR36 | 0.86 | 2.80  | 0.72  | 0.21  | Brown     |
|               |             | CpaF1st11911 | ABF3   | 0.89 | 1.92  | 0.06  | -1.33 | Darkgrey  |
|               |             | CpaF1st19820 | PYL3   | 0.85 | 2.55  | 0.25  | -0.21 | Turquoise |
|               |             | CpaF1st28467 | ARF9   | 0.87 | 1.97  | 0.30  | 0.09  | Brown     |
|               |             | CpaF1st28892 | PYL1   | 0.89 | 3.16  | 0.17  | -0.34 | Turquoise |
|               |             | CpaF1st41693 | PYL9   | 0.99 | 1.79  | -0.26 | 0.08  | Lightcyan |
|               |             | CpaF1st47102 | IAA14  | 0.84 | 0.76  | -0.14 | 2.16  | Darkgrey  |
|               | IBA-<br>ABA | CpaF1st09221 | PYL4   | 0.87 | -0.49 | 0.93  | 1.11  | Bisque4   |
|               |             | CpaF1st36414 | PP2C06 | 0.91 | 3.82  | -0.69 | -1.06 | Lightcyan |

**Table S6. Phytohormone correlation in *C. paliurus* soft cuttings at different stages in AR formation (n=12)**

| Stage                                                                                                                                                | Hormone         | IAA      | IBA      | ABA      | tZR      | GA <sub>1</sub> |
|------------------------------------------------------------------------------------------------------------------------------------------------------|-----------------|----------|----------|----------|----------|-----------------|
| Initial expansion stage (IE)                                                                                                                         | IAA             | 1.00     |          |          |          |                 |
|                                                                                                                                                      | IBA             | -0.988** | 1.00     |          |          |                 |
|                                                                                                                                                      | ABA             | 0.993**  | -0.987** | 1.00     |          |                 |
|                                                                                                                                                      | tZR             | -0.963** | 0.949**  | -0.983** | 1.00     |                 |
|                                                                                                                                                      | GA <sub>1</sub> | -0.979** | 0.953**  | -0.985** | 0.992**  | 1.00            |
| Callus formation stage (CF)                                                                                                                          | IAA             | 1        |          |          |          |                 |
|                                                                                                                                                      | IBA             | -0.934** | 1        |          |          |                 |
|                                                                                                                                                      | ABA             | 0.880*   | -0.976** | 1        |          |                 |
|                                                                                                                                                      | tZR             | -0.907*  | 0.979**  | -0.967** | 1        |                 |
|                                                                                                                                                      | GA <sub>1</sub> | 0.858*   | -0.882*  | 0.934**  | -0.889*  | 1               |
| Rooting stage (RT)                                                                                                                                   | IAA             | 1        |          |          |          |                 |
|                                                                                                                                                      | IBA             | 0.216    | 1        |          |          |                 |
|                                                                                                                                                      | ABA             | 0.122    | 0.984**  | 1        |          |                 |
|                                                                                                                                                      | tZR             | -0.024   | 0.895*   | 0.911*   | 1        |                 |
|                                                                                                                                                      | GA <sub>1</sub> | -0.166   | -0.975** | -0.990** | -0.918** | 1               |
| <p>** . At 0.01 level (double tailed), the correlation is significant.</p> <p>* . At 0.05 level (double tailed), the correlation is significant.</p> |                 |          |          |          |          |                 |

**Table S7. Primers of sequences for qRT-PCR analysis**

| Gene ID      | Forward primer (5'to 3') | Reverse primer (5'to 3') |
|--------------|--------------------------|--------------------------|
| CpaF1st45853 | GGTATGGGTGCTGGTAGTCG     | ATTTTTCGTGGCTGCGGTTC     |
| CpaF1st21228 | AAAGGTGGTCTTGTGGGTGG     | GCGACGGCTTAGGTGACTG      |
| CpaF1st20857 | GCATCCTGCTAAGGCACAAG     | CGCCAACGAGCATCCAGT       |
| CpaF1st19787 | TCAACCAGAAGTCGCACCAA     | ATCGTCACCCACAAGCATCA     |
| CpaF1st16217 | CGAACGGGGCGAAAACA        | GTAAATCACGGGCACCAGAA     |
| CpaF1st32287 | TCTTGACCGCAAAGTCCCTG     | CAAGGCGGCGACAAAAAGTG     |
| CpaF1st13656 | ACGAGTCCTGTCCCTACCTG     | CTGGCAACGAACCCTCTG       |
| CpaF1st45800 | GGTCCGTTACCACCCTTCAC     | TACCAGGCGGCACATCAAC      |
| CpaF1st03325 | TGACGAGAATGTGGCGAGAG     | CGATAGCGAGATGGGTAGGAGT   |
| CpaF1st03194 | GCATTCGTTGCGTTCTTCTCC    | CAGCACCCCTGACTTCCTTG     |



Supplementary Figures:

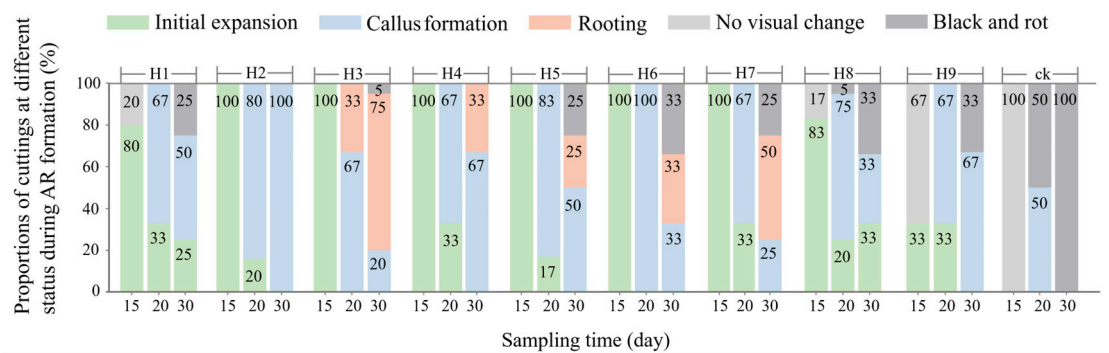

**Figure S1. Differences in rooting process of *C. paliurus* soft cuttings under different hormone formulas**

The numbers reveal the proportion of *C. paliurus* soft cuttings at different status during the adventitious root formation at different sampling times (%). Blocks with different colors represent the different status of *C. paliurus* soft cuttings. H1, H2, H3, H4, H5, H6, H7, H8, and H9 represent different hormone formula treatments respectively, while ck means a control group of *C. paliurus* soft cuttings treated by ABT-1 only.

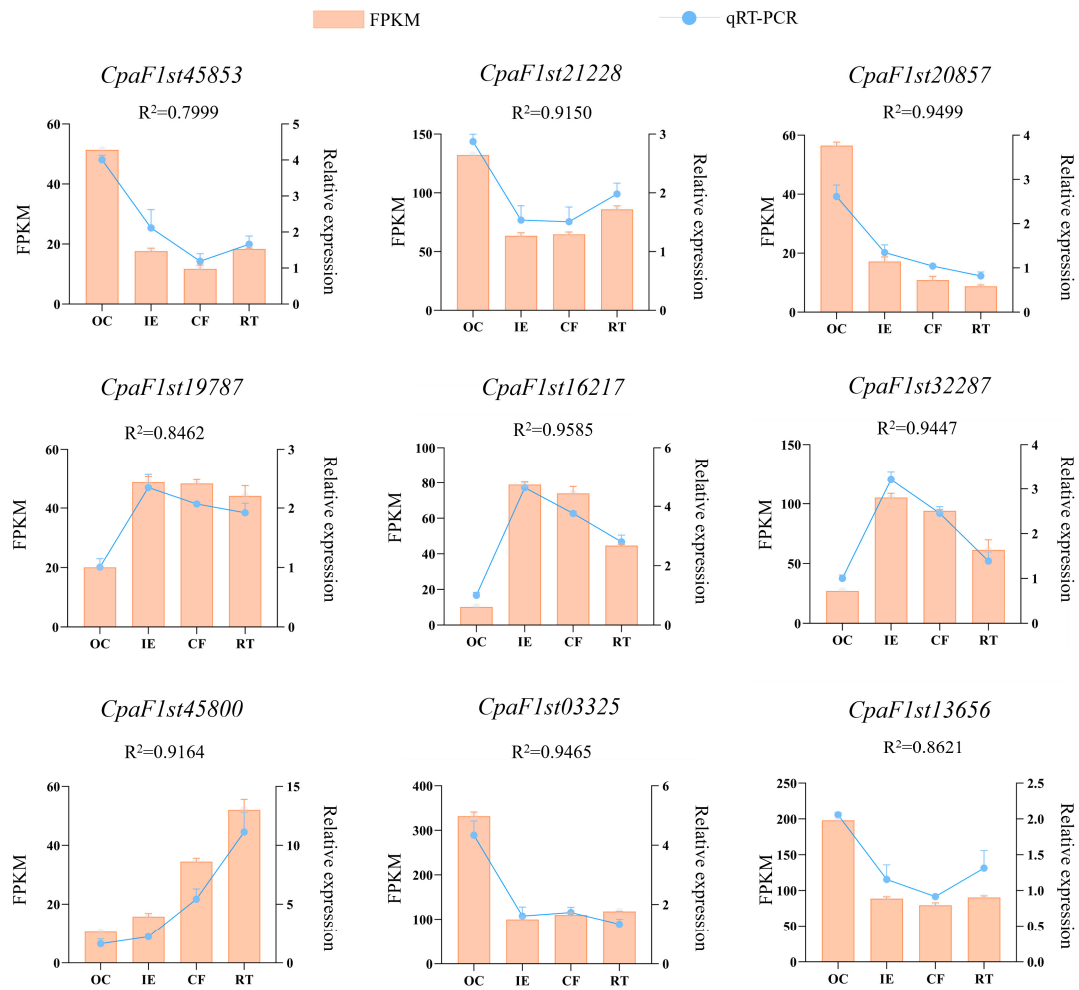

**Figure S2. qRT-PCR validation of the transcriptome data results for 9 selected genes**

Relative expression levels of qRT-PCR were calculated using 18sRNA as a standard. The samples from the base of *C. paliurus* soft cuttings were collected at OC, IE, CF, and RT status and were used for qRT-PCR analysis, while normalized gene levels in original cuttings were arbitrarily set to 1. OC: original cuttings; IE: cuttings in Initial expansion stage; CF: cuttings in callus formation stage; RT: cuttings in rooting stage.
